# Supplementary material for: Human dental pulp stem cells derived extracellular matrix promotes mineralization via Hippo and Wnt pathways
Source: PubMed Central journal article supplement (PMC10957957; doi:10.1038/s41598-024-56845-1), 2024-03-21
Supplement: 41598_2024_56845_MOESM1_ESM.pdf [file 41598_2024_56845_MOESM1_ESM.pdf]

## **Human dental pulp stem cells derived extracellular matrix promotes mineralization via Hippo and Wnt pathways**

Chatvadee Kornsutthisopon<sup>1,#</sup>, Nunthawan Nowwarote<sup>2,3,#</sup>, Ajjima Chansaenroj<sup>1</sup>, Suphalak Photichailert<sup>1</sup>, Sunisa Rochanavibhata<sup>4</sup>, Nuttha Klincumhom<sup>1</sup>, Stephane Petit<sup>3</sup>, Florent Dingli<sup>5</sup>, Damarys Loew<sup>5</sup>, Benjamin P J Fournier<sup>2,3,\*</sup>, Thanaphum Osathanon<sup>1,\*</sup>

<sup>1</sup>Dental Stem Cell Biology Research Unit and Department of Anatomy, Faculty of Dentistry, Chulalongkorn University, Bangkok 10330, Thailand

<sup>2</sup>Centre de Recherche des Cordeliers, Université Paris Cité, Sorbonne Université, INSERM UMR1138, Molecular Oral Pathophysiology, Paris 75006, France.

<sup>3</sup>Department of Oral Biology, Faculty of Dentistry, Université Paris Cité, Paris 75006, France.

<sup>4</sup>Department of Oral and Maxillofacial Surgery, Faculty of Dentistry, Chulalongkorn University, Bangkok 10330, Thailand

<sup>5</sup>Institut Curie, PSL Research University, Centre de Recherche, Laboratoire de Spectrométrie de Masse Protéomique, 26 rue d'Ulm, Paris 75248 Cedex 05, France.

# These authors contributed equally.

### **\*Co-Corresponding author**

Benjamin P J Fournier, DDS, PhD

Centre de Recherche des Cordeliers, Université Paris Cité, Sorbonne Université, Inserm UMR1138, Molecular Oral Pathophysiology, 75006 Paris, France

Université Paris Cité, Dental Faculty, Department of Oral Biology, Paris, France

Tel: +33-6-955-02473

Email: Benjamin.fournier@u-paris.fr

Thanaphum Osathanon, DDS, PhD

Dental Stem Cell Biology Research Unit, Faculty of Dentistry,

34 Henri-Dunant Rd. Pathumwan, Bangkok, 10330 Thailand

Tel: +66-2-218-8885, Fax: +66-2-218-8870

Email: thanaphum.o@chula.ac.th

## Supplementary Fig. 1

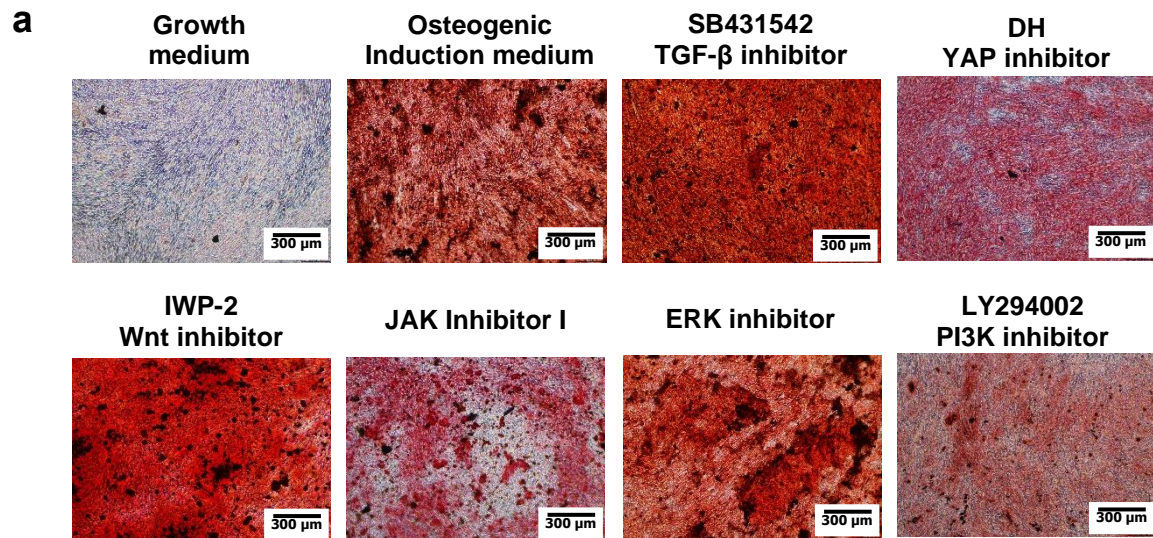

**b**

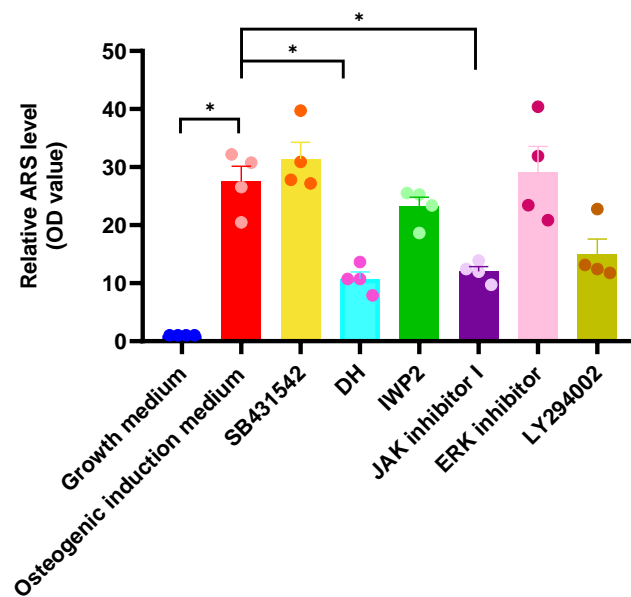

### Supplementary Fig. 1. Relative ARS quantification of GSCs seeded on a tissue culture plate.

GSCs were pretreated with inhibitors 30 min prior to seeding on the tissue culture surface.

**a** The mineral deposition was determined using ARS staining. **b** Relative ARS quantification was illustrated. Bars indicate a significant difference between groups (\*  $p < 0.05$ ).

Supplementary Table 1. The overlapped matrisome proteins of DPSCs and GSCs

| No. | Overlapped matrisome proteins of DPSCs and GSCs                  | Abbreviation |
|-----|------------------------------------------------------------------|--------------|
| 1   | Latent-transforming growth factor beta-binding protein 2         | LTBP2        |
| 2   | Laminin subunit beta-2                                           | LAMB2        |
| 3   | Fibrillin-1                                                      | FBN1         |
| 4   | Thrombospondin type-1 domain-containing protein 4                | THSD4        |
| 5   | Periostin                                                        | POSTN        |
| 6   | Hemicentin-1                                                     | HMCN1        |
| 7   | Nidogen-2                                                        | NID2         |
| 8   | EGF-like repeat and discoidin I-like domain-containing protein 3 | EDIL3        |
| 9   | Fibrillin-2                                                      | FBN2         |
| 10  | Tenascin-X                                                       | TNXB         |
| 11  | Lactadherin                                                      | MFGE8        |
| 12  | Laminin subunit beta-1                                           | LAMB1        |
| 13  | Fibulin-1                                                        | FBLN1        |
| 14  | Target of Nesh-SH3                                               | ABI3BP       |
| 15  | Laminin subunit alpha-3                                          | LAMA3        |
| 16  | Adipocyte enhancer-binding protein 1                             | AEBP1        |
| 17  | Nidogen-1                                                        | NID1         |
| 18  | Laminin subunit alpha-4                                          | LAMA4        |
| 19  | Sushi, nidogen and EGF-like domain-containing protein 1          | SNED1        |
| 20  | Fibulin-2                                                        | FBLN2        |
| 21  | Sushi repeat-containing protein SRPX                             | SRPX         |
| 22  | EGF-containing fibulin-like extracellular matrix protein 2       | EFEMP2       |
| 23  | Fibulin-5                                                        | FBLN5        |
| 24  | Growth arrest-specific protein 6                                 | GAS6         |
| 25  | von Willebrand factor A domain-containing protein 5A             | VWA5A        |
| 26  | Extracellular matrix protein 1                                   | ECM1         |
| 27  | Collagen triple helix repeat-containing protein 1                | CTHRC1       |
| 28  | Thrombospondin-2                                                 | THBS2        |
| 29  | EGF-containing fibulin-like extracellular matrix protein 1       | EFEMP1       |
| 30  | Laminin subunit alpha-5                                          | LAMA5        |
| 31  | Procollagen C-endopeptidase enhancer 1                           | PCOLCE       |
| 32  | Laminin subunit alpha-2                                          | LAMA2        |
| 33  | Microfibrillar-associated protein 5                              | MFAP5        |
| 34  | Cysteine-rich with EGF-like domain protein 1                     | CRELD1       |
| 35  | Slit homolog 1 protein                                           | SLIT1        |
| 36  | Protein CYR61                                                    | CYR61        |
| 37  | Cysteine-rich with EGF-like domain protein 2                     | CRELD2       |
| 38  | EMILIN-2                                                         | EMILIN2      |
| 39  | Laminin subunit alpha-1                                          | LAMA1        |
| 40  | Matrix Gla protein                                               | MGP          |
| 41  | Dermatopontin                                                    | DPT          |
| 42  | Tumor necrosis factor-inducible gene 6 protein                   | TNFAIP6      |

|    |                                                                                  |          |
|----|----------------------------------------------------------------------------------|----------|
| 43 | Latent-transforming growth factor beta-binding protein 4                         | LTBP4    |
| 44 | Microfibrillar-associated protein 1                                              | MFAP1    |
| 45 | Fibrinogen beta chain                                                            | FGB      |
| 46 | Insulin-like growth factor-binding protein 3                                     | IGFBP3   |
| 47 | Thrombospondin-4                                                                 | THBS4    |
| 48 | Fibroleukin                                                                      | FGL2     |
| 49 | Spondin-1                                                                        | SPON1    |
| 50 | Spondin-2                                                                        | SPON2    |
| 51 | Slit homolog 2 protein                                                           | SLIT2    |
| 52 | Microfibril-associated glycoprotein 4                                            | MFAP4    |
| 53 | Latent-transforming growth factor beta-binding protein 2                         | LTBP3    |
| 54 | Sushi, von Willebrand factor type A, EGF and pentraxin domain-containing protein | SVEP1    |
| 55 | Connective tissue growth factor                                                  | CTGF     |
| 56 | Insulin-like growth factor-binding protein 7                                     | IGFBP7   |
| 57 | Insulin-like growth factor-binding protein 5                                     | IGFBP5   |
| 58 | Vitronectin                                                                      | VTN      |
| 59 | Slit homolog 3 protein                                                           | SLIT3    |
| 60 | Sushi repeat-containing protein SRPX2                                            | SRPX2    |
| 61 | Hemicentin-2                                                                     | HMCN2    |
| 62 | Cysteine-rich motor neuron 1 protein                                             | CRIM1    |
| 63 | Serpin H1                                                                        | SERPINH1 |
| 64 | Lysyl oxidase homolog 1                                                          | LOXL1    |
| 65 | CD109 antigen                                                                    | CD109    |
| 66 | Inter-alpha-trypsin inhibitor heavy chain H2                                     | ITIH2    |
| 67 | Matrix metalloproteinase-14                                                      | MMP14    |
| 68 | Procollagen-lysine,2-oxoglutarate 5-dioxygenase 1                                | PLOD1    |
| 69 | Procollagen-lysine,2-oxoglutarate 5-dioxygenase 3                                | PLOD3    |
| 70 | Cathepsin D                                                                      | CTSD     |
| 71 | 72 kDa type IV collagenase                                                       | MMP2     |
| 72 | Procollagen-lysine,2-oxoglutarate 5-dioxygenase 2                                | PLOD2    |
| 73 | Protein-glutamine gamma-glutamyltransferase 2                                    | TGM2     |
| 74 | Prolyl 4-hydroxylase subunit alpha-2                                             | P4HA2    |
| 75 | Disintegrin and metalloproteinase domain-containing protein 17                   | ADAM17   |
| 76 | Interstitial collagenase                                                         | MMP1     |
| 77 | Lysyl oxidase homolog 2                                                          | LOXL2    |
| 78 | Prolyl 4-hydroxylase subunit alpha-1                                             | P4HA1    |
| 79 | Disintegrin and metalloproteinase domain-containing protein 10                   | ADAM10   |
| 80 | Cathepsin B                                                                      | CTSB     |
| 81 | ADAMTS-like protein 1                                                            | ADAMTSL1 |
| 82 | Lysosomal protective protein                                                     | CTSA     |
| 83 | ADAMTS-like protein 4                                                            | ADAMTSL4 |
| 84 | Metalloproteinase inhibitor 3                                                    | TIMP3    |
| 85 | Serine protease HTRA1                                                            | HTRA1    |
| 86 | Serine protease HTRA3                                                            | HTRA3    |
| 87 | Pigment epithelium-derived factor                                                | SERPINF1 |

|     |                                                                  |          |
|-----|------------------------------------------------------------------|----------|
| 88  | Glia-derived nexin                                               | SERPINE2 |
| 89  | Protein-lysine 6-oxidase                                         | LOX      |
| 90  | Disintegrin and metalloproteinase domain-containing protein 9    | ADAM9    |
| 91  | Cathepsin K                                                      | CTSK     |
| 92  | Plasminogen activator inhibitor 1                                | SERPINE1 |
| 93  | Cystatin-B                                                       | CSTB     |
| 94  | Metalloproteinase inhibitor 1                                    | TIMP1    |
| 95  | Inter-alpha-trypsin inhibitor heavy chain H3                     | ITIH3    |
| 96  | Alpha-2-macroglobulin                                            | A2M      |
| 97  | Cathepsin Z                                                      | CTSZ     |
| 98  | Pappalysin-1                                                     | PAPPA    |
| 99  | Urokinase-type plasminogen activator                             | PLAU     |
| 100 | Serpin B8                                                        | SERPINB8 |
| 101 | Serine protease HTRA1                                            | PRSS1    |
| 102 | Tissue-type plasminogen activator                                | PLAT     |
| 103 | Lysyl oxidase homolog 4                                          | LOXL4    |
| 104 | Coagulation factor XIII A chain                                  | F13A1    |
| 105 | Cystatin-C                                                       | CST3     |
| 106 | Serpin B6                                                        | SERPINB6 |
| 107 | Leukocyte elastase inhibitor                                     | SERPINB1 |
| 108 | Prolyl 4-hydroxylase subunit alpha-3                             | P4HA3    |
| 109 | Antithrombin-III                                                 | SERPINC1 |
| 110 | Cathepsin L1                                                     | CTSL     |
| 111 | Extracellular sulfatase Sulf-1                                   | SULF1    |
| 112 | Metalloproteinase inhibitor 2                                    | TIMP2    |
| 113 | Coagulation factor X                                             | F10      |
| 114 | Glycosaminoglycan xylosylkinase                                  | FAM20B   |
| 115 | Plasminogen activator inhibitor 2                                | SERPINB2 |
| 116 | Bone morphogenetic protein 1                                     | BMP1     |
| 117 | Cathepsin S                                                      | CTSS     |
| 118 | Inter-alpha-trypsin inhibitor heavy chain H4                     | ITIH4    |
| 119 | Mannan-binding lectin serine protease 1                          | MASP1    |
| 120 | A disintegrin and metalloproteinase with thrombospondin motifs 1 | ADAMTS1  |
| 121 | Serpin B9                                                        | SERPINB9 |
| 122 | Dipeptidyl peptidase 1                                           | CTSC     |
| 123 | Lysyl oxidase homolog 3                                          | LOXL3    |
| 124 | Annexin A6                                                       | ANXA6    |
| 125 | Chondroitin sulfate proteoglycan 4                               | CSPG4    |
| 126 | Annexin A5                                                       | ANXA5    |
| 127 | Galectin-3                                                       | LGALS3   |
| 128 | Collectin-12                                                     | COLEC12  |
| 129 | Annexin A4                                                       | ANXA4    |
| 130 | Annexin A1                                                       | ANXA1    |
| 131 | Plexin-B2                                                        | PLXNB2   |
| 132 | Annexin A11                                                      | ANXA11   |

|     |                                                                      |         |
|-----|----------------------------------------------------------------------|---------|
| 133 | Galectin-1                                                           | LGALS1  |
| 134 | Annexin A7                                                           | ANXA7   |
| 135 | Annexin A2                                                           | ANXA2   |
| 136 | Protein ERGIC-53                                                     | LMAN1   |
| 137 | Glypican-1                                                           | GPC1    |
| 138 | Syndecan-4                                                           | SDC4    |
| 139 | Galectin-8                                                           | LGALS8  |
| 140 | Annexin A3                                                           | ANXA3   |
| 141 | Semaphorin-3C                                                        | SEMA3C  |
| 142 | Plexin domain-containing protein 2                                   | PLXDC2  |
| 143 | Glypican-6                                                           | GPC6    |
| 144 | Plexin-B1                                                            | PLXNB1  |
| 145 | Complement C1q tumor necrosis factor-related protein 5               | C1QTNF5 |
| 146 | Plexin-A1                                                            | PLXNA1  |
| 147 | C-type lectin domain family 11 member A                              | CLEC11A |
| 148 | Semaphorin-3A                                                        | SEMA3A  |
| 149 | Syndecan-1                                                           | SDC1    |
| 150 | Plexin-D1                                                            | PLXND1  |
| 151 | Basement membrane-specific heparan sulfate proteoglycan core protein | HSPG2   |
| 152 | Versican core protein                                                | VCAN    |
| 153 | Decorin                                                              | DCN     |
| 154 | Lumican                                                              | LUM     |
| 155 | Podocan                                                              | PODN    |
| 156 | Fibromodulin                                                         | FMOD    |
| 157 | Mimecan                                                              | OGN     |
| 158 | Biglycan                                                             | BGN     |
| 159 | Hyaluronan and proteoglycan link protein 1                           | HAPLN1  |
| 160 | Protein S100-A13                                                     | S100A13 |
| 161 | Host cell factor 1                                                   | HCFC1   |
| 162 | Angiopoietin-related protein 2                                       | ANGPTL2 |
| 163 | Protein S100-A11                                                     | S100A11 |
| 164 | Protein S100-A16                                                     | S100A16 |
| 165 | Fibroblast growth factor 2                                           | FGF2    |
| 166 | Growth/differentiation factor 15                                     | GDF15   |
| 167 | Stromal cell-derived factor 1                                        | CXCL12  |
| 168 | Follistatin-related protein 1                                        | FSTL1   |
| 169 | Collagen and calcium-binding EGF domain-containing protein 1         | CCBE1   |

**Supplementary Table 2. The oligonucleotide sequences**

| <b>Genes</b>  | <b>Forward sequences</b>     | <b>Reverse sequences</b>       | <b>GenBank Accession Number</b> |
|---------------|------------------------------|--------------------------------|---------------------------------|
| <i>GAPDH</i>  | 5'-TCATGGGTGTGAACCATGAGAA-3' | 5'-GGCATGGACTGTGGTCATGAG-3'    | NM_002046.3                     |
| <i>AXIN2</i>  | 5'-ATGATTCCATGTCCATGACG-3'   | 5'-CTTCACACTGCGATGCATTT-3'     | NM_001363813.1                  |
| <i>BMP2</i>   | 5'-GCGTGAAAAGAGAGACTGC-3'    | 5'-CCATTGAAAGAGCGTCCAC-3'      | NM_001200.4                     |
| <i>CAMKII</i> | 5'-TGGGAGAAGAGGCAAAGCTA-3'   | 5'-AACGAAACCCTGTGGTGAAG-3'     | NM_172170.5                     |
| <i>CCND1</i>  | 5'-ATCTCTGTACTTTGCTTGCT-3'   | 5'-AGTACATGGATATTCCCAA-3'      | NM_053056.3                     |
| <i>CTGF</i>   | 5'-TTAGCGTGCTCACTGACCTG-3'   | 5'-GCCACAAGCTGTCCAGTCTA-3'     | NM_001901.3                     |
| <i>FGF1</i>   | 5'-GGCTTCTTCCTGCGCATCCAC-3'  | 5'-GGTAACGGTTAGCACACACTCCT-3'  | NM_001361665.2                  |
| <i>LEF1</i>   | 5'-TCTTCCTTGGTGAACGAGTCT-3'  | 5'-GATGCTTTCCGTCATCGGG-3'      | NM_001130714.2                  |
| <i>MMP3</i>   | 5'-ATTCCATGGAGCCAGGCTTTC-3'  | 5'-CATTTGGGTCAAACCTCCAAGTGT-3' | NM_002422.5                     |
| <i>POSTN</i>  | 5'-TGTTGCCCTGGTTATATGAG-3'   | 5'-ACTCGGTGCAAAGTAAGTGA-3'     | NM_006475.2                     |
| <i>RHOA</i>   | 5'-TATCGAGGTGGATGGAAAGC-3'   | 5'-TTCTGGGGTCCACTTTTCTG-3'     | NM_001313945.2                  |
| <i>ROCK1</i>  | 5'-GAAGCTCGAGAGAAGGCTGA-3'   | 5'-GCTCCAGTTGCAGGGTTAGA-3'     | NM_005406.3                     |
| <i>ROR2</i>   | 5'-GAAGAGGACGACGACGAGGT-3'   | 5'-CGGGACACTGAGAGCAGAAG-3'     | NM_001318204.2                  |
